# Supplementary material for: Efficacy of acupuncture for anxiety and depression in functional dyspepsia: A systematic review and meta-analysis
Source: PubMed Central journal article supplement (PMC10919749; doi:10.1371/journal.pone.0298438), 2024-03-07
Supplement: pone.0298438.s002.pdf [file pone.0298438.s002.pdf]

**Supplemental Table 1. PubMed search strategy**

| Database             | #1     | "Dyspepsia"[Mesh]                                                                                                                                                                                                                                                                                                                                                                                                                                                                                                                                        |
|----------------------|--------|----------------------------------------------------------------------------------------------------------------------------------------------------------------------------------------------------------------------------------------------------------------------------------------------------------------------------------------------------------------------------------------------------------------------------------------------------------------------------------------------------------------------------------------------------------|
| Pubmed               | #2     | (((((Dyspepsias[Title/Abstract]) OR (Indigestion[Title/Abstract])) OR (Indigestions[Title/Abstract])) OR (Functional dyspepsia[Title/Abstract])) OR (non-ulcer dyspepsia[Title/Abstract])) OR (postprandial distress syndrome[Title/Abstract])) OR (epigastric pain syndrome[Title/Abstract])                                                                                                                                                                                                                                                            |
|                      | #3     | #1 OR #2                                                                                                                                                                                                                                                                                                                                                                                                                                                                                                                                                 |
|                      | #4     | "Acupuncture"[Mesh]                                                                                                                                                                                                                                                                                                                                                                                                                                                                                                                                      |
|                      | #5     | ((((((((((Pharmacoacupuncture[Title/Abstract]) OR (Acupotomy Title/Abstract])) OR (Acupotomies[Title/Abstract])) OR (Pharmacopuncture Treatment[Title/Abstract])) OR (Needle[Title/Abstract])) OR (Needling[Title/Abstract])) OR (electroacupuncture[Title/Abstract])) OR (electro-acupuncture[Title/Abstract])) OR (auricular acupuncture[Title/Abstract])) OR (Ear Acupuncture[Title/Abstract])) OR (warm needle[Title/Abstract])) OR (Moxibustion[Title/Abstract])) OR (Acupuncture Points[Title/Abstract])) OR (Acupuncture Therapy[Title/Abstract]) |
|                      | #6     | #4 OR #5                                                                                                                                                                                                                                                                                                                                                                                                                                                                                                                                                 |
|                      | #7     | randomized controlled trial[Publication Type] OR randomized[Title/Abstract] OR placebo[Title/Abstract]                                                                                                                                                                                                                                                                                                                                                                                                                                                   |
|                      | #8     | #3 AND #6 AND #7                                                                                                                                                                                                                                                                                                                                                                                                                                                                                                                                         |
|                      | Embase | #1                                                                                                                                                                                                                                                                                                                                                                                                                                                                                                                                                       |
| #2                   |        | 'Pharmacoacupuncture':ab,ti OR 'Acupotomy':ab,ti OR 'Acupotomies':ab,ti OR 'Pharmacopuncture Treatment':ab,ti OR 'Needle':ab,ti OR 'Needling':ab,ti OR 'electroacupuncture':ab,ti OR 'electro-acupuncture':ab,ti OR 'auricular acupuncture':ab,ti OR 'Acupunctures, Ear':ab,ti OR 'Ear Acupuncture':ab,ti OR 'warm needle':ab,ti OR 'Moxibustion':ab,ti OR 'Acupuncture Points':ab,ti OR 'Acupuncture Therapy':ab,ti                                                                                                                                     |
| #3                   |        | 'randomized controlled trial':ab,ti OR 'randomized':ab,ti OR 'placebo':ab,ti OR 'RCT':ab,ti                                                                                                                                                                                                                                                                                                                                                                                                                                                              |
| #4                   |        | #1 AND #2 AND #3                                                                                                                                                                                                                                                                                                                                                                                                                                                                                                                                         |
| Web of science       | #1     | TS=(Dyspepsia OR Dyspepsias OR Indigestion OR Indigestions OR Functional dyspepsia OR non-ulcer dyspepsia OR postprandial distress syndrome OR epigastric pain syndrome)                                                                                                                                                                                                                                                                                                                                                                                 |
|                      | #2     | TS=(Acupuncture OR Pharmacoacupuncture OR Acupotomy OR Acupotomies OR Pharmacopuncture Treatment OR Needle OR Needling OR electroacupuncture OR electro-acupuncture OR auricular acupuncture OR Acupunctures, Ear OR Ear Acupuncture OR warm needle OR Moxibustion OR Acupuncture Points OR Acupuncture Therapy)                                                                                                                                                                                                                                         |
|                      | #3     | TS=(randomized controlled trial OR randomized OR placebo OR RCT)                                                                                                                                                                                                                                                                                                                                                                                                                                                                                         |
|                      | #4     | #1 AND #2 AND #3                                                                                                                                                                                                                                                                                                                                                                                                                                                                                                                                         |
| The Cochrane library | #1     | (Dyspepsias):ab,ti,kw OR (Indigestion):ab,ti,kw OR (Indigestions):ab,ti,kw OR (Functional dyspepsia):ab,ti,kw OR (non-ulcer dyspepsia):ab,ti,kw OR (postprandial distress syndrome):ab,ti,kw OR (epigastric pain syndrome):ab,ti,kw                                                                                                                                                                                                                                                                                                                      |
|                      | #2     | (Pharmacoacupuncture):ab,ti,kw OR(Acupotomy):ab,ti,kw OR (Acupotomies):ab,ti,kw OR(Pharmacopuncture Treatment):ab,ti,kw OR (Needle):ab,ti,kw                                                                                                                                                                                                                                                                                                                                                                                                             |

|         |     |                                                                                                                                                                                                                                                                             |
|---------|-----|-----------------------------------------------------------------------------------------------------------------------------------------------------------------------------------------------------------------------------------------------------------------------------|
|         |     | OR(Needling):ab,ti,kw OR (electroacupuncture):ab,ti,kw OR(electro-acupuncture):ab,ti,kw OR (auricular acupuncture):ab,ti,kw OR(Acupunctures, Ear):ab,ti,kw OR (Ear Acupuncture):ab,ti,kw OR(warm needle):ab,ti,kw OR (Moxibustion):ab,ti,kw OR(Acupuncture Points):ab,ti,kw |
|         | #3  | (randomized controlled trial):ab,ti,kw OR(randomized):ab,ti,kw OR (placebo):ab,ti,kw OR(RCT):ab,ti,kw                                                                                                                                                                       |
|         | #4  | # 1 AND #2 AND #3                                                                                                                                                                                                                                                           |
| CNKI    | #1  | 篇关摘 = 消化不良 + 非溃疡性消化不良 + 非溃疡消化不良 + 功能性消化不良 + 餐后窘迫综合征 + 上腹疼痛综合征 + FD                                                                                                                                                                                                          |
|         | #2  | 篇关摘 =针灸 + 针刺 + 手针 + 体针 + 耳针 + 电针 + 火针 + 温针 + 艾灸 + 灸法 + 针 + 灸 + 穴 + 埋线                                                                                                                                                                                                       |
|         | #3  | 篇关摘 =随机对照实验 + 随机对照试验 + RCT + 随机对照 + 随机                                                                                                                                                                                                                                      |
|         | #4  | #1 AND #2 AND #3                                                                                                                                                                                                                                                            |
| WanFang | #1  | 主题 = 消化不良 + 非溃疡性消化不良 + 非溃疡消化不良 + 功能性消化不良 + 餐后窘迫综合征 + 上腹疼痛综合征 + FD                                                                                                                                                                                                           |
|         | #2  | 主题 =针灸 + 针刺 + 手针 + 体针 + 耳针 + 电针 + 火针 + 温针 + 艾灸 + 灸法 + 针 + 灸 + 穴 + 埋线                                                                                                                                                                                                        |
|         | #3  | 主题 =随机对照实验 + 随机对照试验 + RCT + 随机对照 + 随机                                                                                                                                                                                                                                       |
|         | #4  | #1 AND #2 AND #3                                                                                                                                                                                                                                                            |
| VIP     | #1  | 题目或关键词 = 消化不良 OR 非溃疡性消化不良 OR 非溃疡消化不良 OR 功能性消化不良 OR 餐后窘迫综合征 OR 上腹疼痛综合征 OR FD                                                                                                                                                                                                 |
|         | #2  | 题目或关键词=针灸 OR 针刺 OR 手针 OR 体针 OR 耳针 OR 电针 OR 火针 OR 温针 OR 艾灸 OR 灸法 OR 针 OR 灸 OR 穴 OR 埋线                                                                                                                                                                                        |
|         | #3  | 题目或关键词=随机对照实验 OR 随机对照试验 OR RCT OR 随机对照 OR 随机                                                                                                                                                                                                                                |
|         | #4  | #1 AND #2 AND #3                                                                                                                                                                                                                                                            |
| CBM     | #1  | "消化不良"[不加权:扩展]                                                                                                                                                                                                                                                              |
|         | #2  | "功能性消化不良"[常用字段:智能] OR "非溃疡性消化不良"[常用字段:智能] OR "非溃疡消化不良"[常用字段:智能] OR "上腹疼痛综合征"[常用字段:智能] OR "餐后窘迫综合征"[常用字段:智能] OR "FD"[常用字段:智能]                                                                                                                                                |
|         | #3  | (#2) OR (#1)                                                                                                                                                                                                                                                                |
|         | #4  | (((((("针灸疗法"[不加权:扩展]) OR "温针疗法"[不加权:扩展]) OR "电针"[不加权:扩展]) OR "火针疗法"[不加权:扩展]) OR "灸法"[不加权:扩展]) OR "埋线"[不加权:扩展]) OR "穴位贴敷法"[不加权:扩展]) OR "耳穴贴压"[不加权:扩展]) OR "推拿"[不加权:扩展]) OR "针刺疗法"[不加权:扩展]                                                                                    |
|         | #5  | "针刺"[常用字段:智能] OR "电针"[常用字段:智能] OR "火针"[常用字段:智能] OR "温针"[常用字段:智能] OR "艾灸"[常用字段:智能] OR "埋线"[常用字段:智能] OR "贴敷"[常用字段:智能] OR "耳穴"[常用字段:智能] OR "推拿"[常用字段:智能] OR "中医外治"[常用字段:智能]                                                                                                    |
|         | #6  | (#5) OR (#4)                                                                                                                                                                                                                                                                |
|         | #7  | 随机对照试验[不加权:扩展]                                                                                                                                                                                                                                                              |
|         | #8  | "随机对照试验"[常用字段:智能] OR "随机对照实验"[常用字段:智能] OR "随机对照研究"[常用字段:智能] OR "随机对照"[常用字段:智能] OR "随机"[常用字段:智能] OR "RCT"[常用字段:智能]                                                                                                                                                           |
|         | #9  | (#8) OR (#7)                                                                                                                                                                                                                                                                |
|         | #10 | (#9) AND (#6) AND (#3)                                                                                                                                                                                                                                                      |

### Sensitivity analysis of SAS

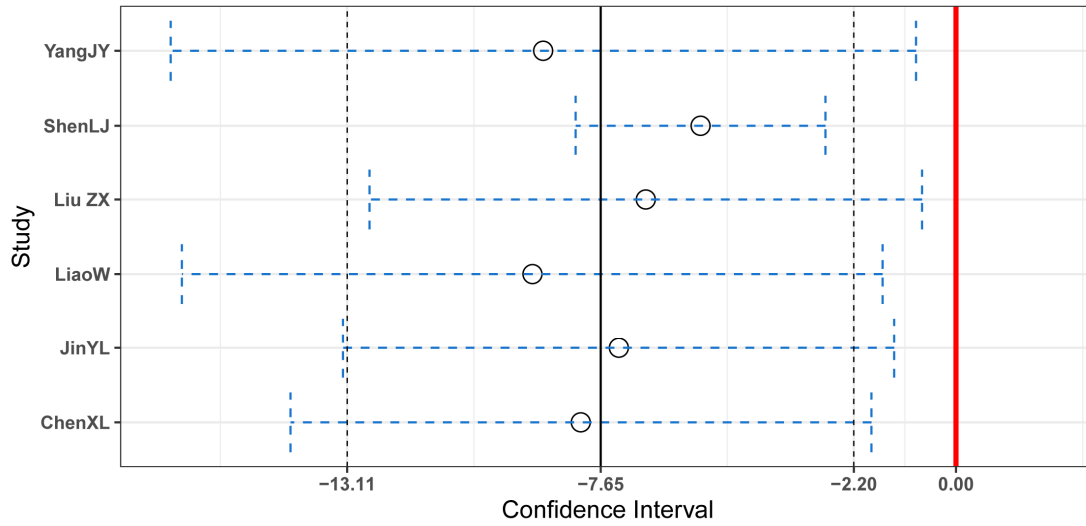

**Supplemental Fig 1. Sensitivity analysis of SAS**

### Sensitivity analysis of SDS

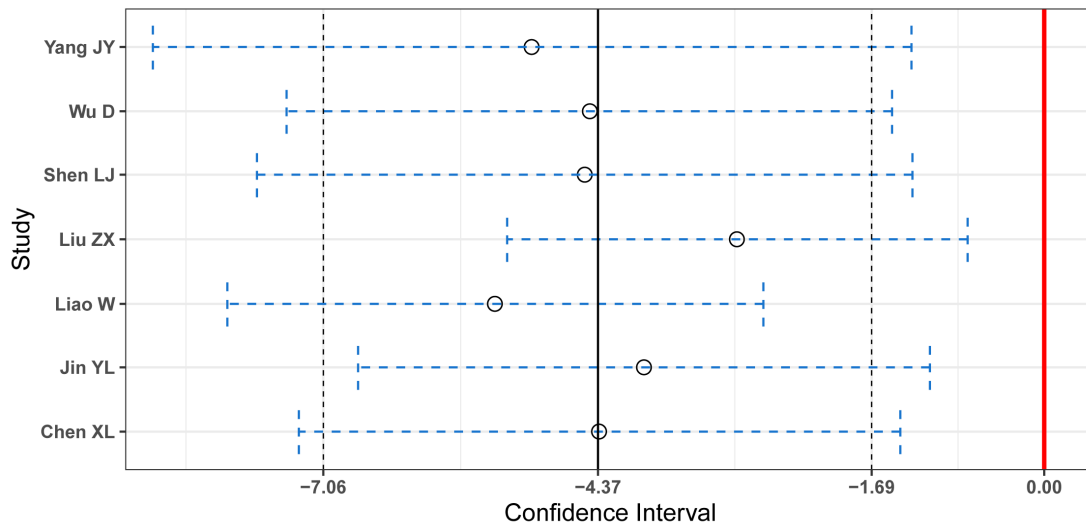

**Supplemental Fig 2. Sensitivity analysis of SDS**

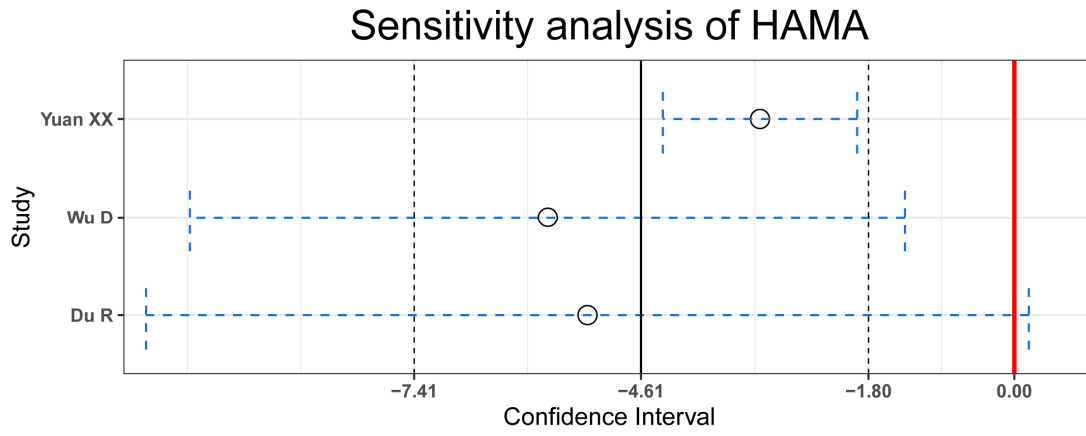

**Supplemental Fig 3. Sensitivity analysis of HAMA**

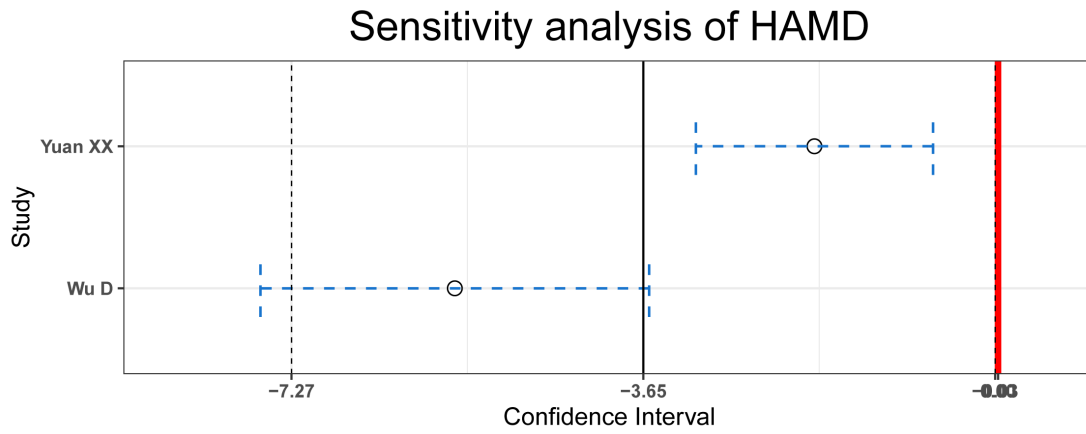

**Supplemental Fig 4. Sensitivity analysis of HAMD**

## Sensitivity analysis of Global Symptom

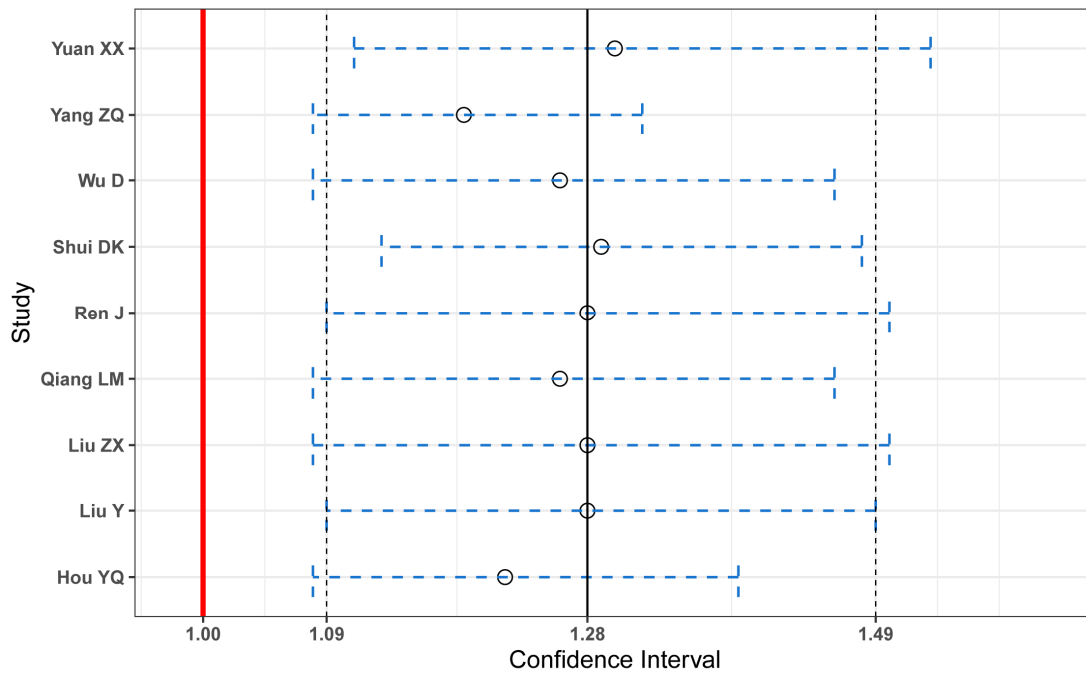

**Supplemental Fig 5. Sensitivity analysis of Global Symptom**

| SAS for anxiety and depression in functional dyspepsia                              |                                          |                                                                                                                                        |                          |                              |                                     |          |
|-------------------------------------------------------------------------------------|------------------------------------------|----------------------------------------------------------------------------------------------------------------------------------------|--------------------------|------------------------------|-------------------------------------|----------|
| Patient or population: patients with anxiety and depression in functional dyspepsia |                                          |                                                                                                                                        |                          |                              |                                     |          |
| Settings:                                                                           |                                          |                                                                                                                                        |                          |                              |                                     |          |
| Intervention: SAS                                                                   |                                          |                                                                                                                                        |                          |                              |                                     |          |
| Outcomes                                                                            | Illustrative comparative risks* (95% CI) |                                                                                                                                        | Relative effect (95% CI) | No of Participants (studies) | Quality of the evidence (GRADE)     | Comments |
|                                                                                     | Assumed risk                             | Corresponding risk                                                                                                                     |                          |                              |                                     |          |
|                                                                                     | Control                                  | SAS                                                                                                                                    |                          |                              |                                     |          |
| SAS_sub - Acupuncture vs. First-Line                                                |                                          | The mean sas_sub - acupuncture vs. first-line in the intervention groups was <b>8.89 lower</b> (22.86 lower to 5.09 higher)            |                          | 130 (2 studies)              | ⊕⊕⊕⊕<br>very low <sup>1,2,3,4</sup> |          |
| SAS_sub - Acupuncture vs. First-line+Second-line                                    |                                          | The mean sas_sub - acupuncture vs. first-line+second-line in the intervention groups was <b>6.49 lower</b> (18.16 lower to 5.2 higher) |                          | 180 (2 studies)              | ⊕⊕⊕⊕<br>very low <sup>1,2,3,4</sup> |          |
| SAS_sub - Acupuncture vs. Placebo Acupuncture                                       |                                          | The mean sas_sub - acupuncture vs. placebo acupuncture in the intervention groups was <b>7.07 lower</b> (11.03 to 3.1 lower)           |                          | 83 (2 studies)               | ⊕⊕⊕⊕<br>very low <sup>2,3,5,6</sup> |          |

\*The basis for the **assumed risk** (e.g. the median control group risk across studies) is provided in footnotes. The **corresponding risk** (and its 95% confidence interval) is based on the assumed risk in the comparison group and the **relative effect** of the intervention (and its 95% CI).

CI: Confidence interval;  
GRADE Working Group grades of evidence  
**High quality:** Further research is very unlikely to change our confidence in the estimate of effect.  
**Moderate quality:** Further research is likely to have an important impact on our confidence in the estimate of effect and may change the estimate.  
**Low quality:** Further research is very likely to have an important impact on our confidence in the estimate of effect and is likely to change the estimate.  
**Very low quality:** We are very uncertain about the estimate.

<sup>1</sup> Blind method not described in detail  
<sup>2</sup> No detailed description of random methods or allocation of hidden methods  
<sup>3</sup> heterogeneity  
<sup>4</sup> Confidence interval is too wide  
<sup>5</sup> Per-Protocol analysis  
<sup>6</sup> Publication Bias

**Supplemental Fig 6. GRADE assessment for the SAS**

| SDS for anxiety and depression in functional dyspepsia                              |                                          |                                                                                                                                        |                          |                              |                                     |          |
|-------------------------------------------------------------------------------------|------------------------------------------|----------------------------------------------------------------------------------------------------------------------------------------|--------------------------|------------------------------|-------------------------------------|----------|
| Patient or population: patients with anxiety and depression in functional dyspepsia |                                          |                                                                                                                                        |                          |                              |                                     |          |
| Settings:                                                                           |                                          |                                                                                                                                        |                          |                              |                                     |          |
| Intervention: SDS                                                                   |                                          |                                                                                                                                        |                          |                              |                                     |          |
| Outcomes                                                                            | Illustrative comparative risks* (95% CI) |                                                                                                                                        | Relative effect (95% CI) | No of Participants (studies) | Quality of the evidence (GRADE)     | Comments |
|                                                                                     | Assumed risk Control                     | Corresponding risk SDS                                                                                                                 |                          |                              |                                     |          |
| SDS_sub - Acupuncture vs. First-Line                                                |                                          | The mean sds_sub - acupuncture vs. first-line in the intervention groups was <b>2.71 lower</b> (5.19 to 0.23 lower)                    |                          | 130 (2 studies)              | ⊕⊕⊕⊕<br>very low <sup>1,2,3</sup>   |          |
| SDS_sub - Acupuncture vs. First-line+Second-line                                    |                                          | The mean sds_sub - acupuncture vs. first-line+second-line in the intervention groups was <b>5.02 lower</b> (17.4 lower to 7.36 higher) |                          | 180 (2 studies)              | ⊕⊕⊕⊕<br>very low <sup>1,2,3,4</sup> |          |
| SDS_sub - Acupuncture vs. Placebo Acupuncture                                       |                                          | The mean sds_sub - acupuncture vs. placebo acupuncture in the intervention groups was <b>4.63 lower</b> (6.28 to 2.98 lower)           |                          | 173 (3 studies)              | ⊕⊕⊕⊕<br>low <sup>1,2,5</sup>        |          |

\*The basis for the **assumed risk** (e.g. the median control group risk across studies) is provided in footnotes. The **corresponding risk** (and its 95% confidence interval) is based on the assumed risk in the comparison group and the **relative effect** of the intervention (and its 95% CI).

CI: Confidence interval;

GRADE Working Group grades of evidence  
**High quality:** Further research is very unlikely to change our confidence in the estimate of effect.  
**Moderate quality:** Further research is likely to have an important impact on our confidence in the estimate of effect and may change the estimate.  
**Low quality:** Further research is very likely to have an important impact on our confidence in the estimate of effect and is likely to change the estimate.  
**Very low quality:** We are very uncertain about the estimate.

<sup>1</sup> Blind method not described in detail  
<sup>2</sup> No detailed description of random methods or allocation of hidden methods  
<sup>3</sup> heterogeneity  
<sup>4</sup> Confidence interval is too wide  
<sup>5</sup> Per-Protocol analysis

## Supplemental Fig 7. GRADE assessment for the SDS

| HAMA for anxiety and depression in functional dyspepsia                             |                                          |                                                                                                                               |                          |                              |                                   |          |
|-------------------------------------------------------------------------------------|------------------------------------------|-------------------------------------------------------------------------------------------------------------------------------|--------------------------|------------------------------|-----------------------------------|----------|
| Patient or population: patients with anxiety and depression in functional dyspepsia |                                          |                                                                                                                               |                          |                              |                                   |          |
| Settings:                                                                           |                                          |                                                                                                                               |                          |                              |                                   |          |
| Intervention: HAMA                                                                  |                                          |                                                                                                                               |                          |                              |                                   |          |
| Outcomes                                                                            | Illustrative comparative risks* (95% CI) |                                                                                                                               | Relative effect (95% CI) | No of Participants (studies) | Quality of the evidence (GRADE)   | Comments |
|                                                                                     | Assumed risk Control                     | Corresponding risk HAMA                                                                                                       |                          |                              |                                   |          |
| HAMA_sub - Acupuncture vs. First-Line                                               |                                          | The mean hama_sub - acupuncture vs. first-line in the intervention groups was <b>5.76 lower</b> (10.18 to 1.35 lower)         |                          | 158 (2 studies)              | ⊕⊕⊕⊕<br>very low <sup>1,2,3</sup> |          |
| HAMA_sub - Acupuncture vs. Placebo Acupuncture                                      |                                          | The mean hama_sub - acupuncture vs. placebo acupuncture in the intervention groups was <b>2.58 lower</b> (4.33 to 0.83 lower) |                          | 90 (1 study)                 | ⊕⊕⊕⊕<br>very low <sup>1,2,4</sup> |          |

\*The basis for the **assumed risk** (e.g. the median control group risk across studies) is provided in footnotes. The **corresponding risk** (and its 95% confidence interval) is based on the assumed risk in the comparison group and the **relative effect** of the intervention (and its 95% CI).

CI: Confidence interval;

GRADE Working Group grades of evidence  
**High quality:** Further research is very unlikely to change our confidence in the estimate of effect.  
**Moderate quality:** Further research is likely to have an important impact on our confidence in the estimate of effect and may change the estimate.  
**Low quality:** Further research is very likely to have an important impact on our confidence in the estimate of effect and is likely to change the estimate.  
**Very low quality:** We are very uncertain about the estimate.

<sup>1</sup> Blind method not described in detail  
<sup>2</sup> No detailed description of random methods or allocation of hidden methods  
<sup>3</sup> heterogeneity  
<sup>4</sup> Imprecision due to less research

## Supplemental Fig 8. GRADE assessment for the HAMA

| HAMD for anxiety and depression in functional dyspepsia                             |                                          |                                                                                                                               |                          |                              |                                          |          |
|-------------------------------------------------------------------------------------|------------------------------------------|-------------------------------------------------------------------------------------------------------------------------------|--------------------------|------------------------------|------------------------------------------|----------|
| Patient or population: patients with anxiety and depression in functional dyspepsia |                                          |                                                                                                                               |                          |                              |                                          |          |
| Settings:                                                                           |                                          |                                                                                                                               |                          |                              |                                          |          |
| Intervention: HAMD                                                                  |                                          |                                                                                                                               |                          |                              |                                          |          |
| Outcomes                                                                            | Illustrative comparative risks* (95% CI) |                                                                                                                               | Relative effect (95% CI) | No of Participants (studies) | Quality of the evidence (GRADE)          | Comments |
|                                                                                     | Assumed risk                             | Corresponding risk                                                                                                            |                          |                              |                                          |          |
|                                                                                     | Control                                  | HAMD                                                                                                                          |                          |                              |                                          |          |
| HAMD_sub - Acupuncture vs. First-Line                                               |                                          | The mean hamd_sub - acupuncture vs. first-line in the intervention groups was <b>5.59 lower</b> (7.59 to 3.59 lower)          |                          | 63 (1 study)                 | ⊕⊕⊕⊕<br><b>very low</b> <sup>1,2,3</sup> |          |
| HAMD_sub - Acupuncture vs. Placebo Acupuncture                                      |                                          | The mean hamd_sub - acupuncture vs. placebo acupuncture in the intervention groups was <b>1.89 lower</b> (3.11 to 0.67 lower) |                          | 90 (1 study)                 | ⊕⊕⊕⊕<br><b>low</b> <sup>1,3</sup>        |          |

\*The basis for the **assumed risk** (e.g. the median control group risk across studies) is provided in footnotes. The **corresponding risk** (and its 95% confidence interval) is based on the assumed risk in the comparison group and the **relative effect** of the intervention (and its 95% CI).

Ci: Confidence interval.

GRADE Working Group grades of evidence  
**High quality:** Further research is very unlikely to change our confidence in the estimate of effect.  
**Moderate quality:** Further research is likely to have an important impact on our confidence in the estimate of effect and may change the estimate.  
**Low quality:** Further research is very likely to have an important impact on our confidence in the estimate of effect and is likely to change the estimate.  
**Very low quality:** We are very uncertain about the estimate.

<sup>1</sup> Blind method not described in detail  
<sup>2</sup> No detailed description of random methods or allocation of hidden methods  
<sup>3</sup> Imprecision due to less research

## Supplemental Fig 9. GRADE assessment for the HAMD

| HADS for anxiety and depression in functional dyspepsia                             |                                          |                                                                                         |                          |                              |                                      |          |
|-------------------------------------------------------------------------------------|------------------------------------------|-----------------------------------------------------------------------------------------|--------------------------|------------------------------|--------------------------------------|----------|
| Patient or population: patients with anxiety and depression in functional dyspepsia |                                          |                                                                                         |                          |                              |                                      |          |
| Settings:                                                                           |                                          |                                                                                         |                          |                              |                                      |          |
| Intervention: HADS                                                                  |                                          |                                                                                         |                          |                              |                                      |          |
| Outcomes                                                                            | Illustrative comparative risks* (95% CI) |                                                                                         | Relative effect (95% CI) | No of Participants (studies) | Quality of the evidence (GRADE)      | Comments |
|                                                                                     | Assumed risk                             | Corresponding risk                                                                      |                          |                              |                                      |          |
|                                                                                     | Control                                  | HADS                                                                                    |                          |                              |                                      |          |
| HADS                                                                                |                                          | The mean hads in the intervention groups was <b>1 lower</b> (2.65 lower to 0.65 higher) |                          | 278 (1 study)                | ⊕⊕⊕⊕<br><b>moderate</b> <sup>1</sup> |          |

\*The basis for the **assumed risk** (e.g. the median control group risk across studies) is provided in footnotes. The **corresponding risk** (and its 95% confidence interval) is based on the assumed risk in the comparison group and the **relative effect** of the intervention (and its 95% CI).

Ci: Confidence interval.

GRADE Working Group grades of evidence  
**High quality:** Further research is very unlikely to change our confidence in the estimate of effect.  
**Moderate quality:** Further research is likely to have an important impact on our confidence in the estimate of effect and may change the estimate.  
**Low quality:** Further research is very likely to have an important impact on our confidence in the estimate of effect and is likely to change the estimate.  
**Very low quality:** We are very uncertain about the estimate.

<sup>1</sup> Imprecision due to less research

## Supplemental Fig 10. GRADE assessment for the HADS

**Efficiency for anxiety and depression in functional dyspepsia**

**Patient or population:** patients with anxiety and depression in functional dyspepsia

**Settings:**

**Intervention:** Efficiency

| Outcomes                                                | Illustrative comparative risks* (95% CI) |                                  | Relative effect (95% CI)  | No of Participants (studies) | Quality of the evidence (GRADE)     | Comments |
|---------------------------------------------------------|------------------------------------------|----------------------------------|---------------------------|------------------------------|-------------------------------------|----------|
|                                                         | Assumed risk<br>Control                  | Corresponding risk<br>Efficiency |                           |                              |                                     |          |
| Efficiency_sub - Acupuncture vs. First-Line             | Study population                         |                                  | RR 1.11<br>(1.02 to 1.21) | 335<br>(5 studies)           | ⊕⊕⊕⊖<br>low <sup>1,2</sup>          |          |
|                                                         | 804 per 1000                             | 892 per 1000<br>(820 to 972)     |                           |                              |                                     |          |
|                                                         | Moderate                                 |                                  |                           |                              |                                     |          |
| Efficiency_sub - Acupuncture vs. First-line+Second-line | Study population                         |                                  | RR 1.24<br>(1.04 to 1.47) | 100<br>(1 study)             | ⊕⊕⊕⊖<br>very low <sup>1,2,3</sup>   |          |
|                                                         | 760 per 1000                             | 942 per 1000<br>(790 to 1000)    |                           |                              |                                     |          |
|                                                         | Moderate                                 |                                  |                           |                              |                                     |          |
| Efficiency_sub - Acupuncture vs. Placebo<br>Acupuncture | Study population                         |                                  | RR 1.72<br>(1.14 to 2.61) | 208<br>(3 studies)           | ⊕⊕⊕⊖<br>very low <sup>1,2,4,5</sup> |          |
|                                                         | 524 per 1000                             | 902 per 1000<br>(598 to 1000)    |                           |                              |                                     |          |
|                                                         | Moderate                                 |                                  |                           |                              |                                     |          |
|                                                         | 433 per 1000                             | 745 per 1000<br>(494 to 1000)    |                           |                              |                                     |          |

\*The basis for the **assumed risk** (e.g. the median control group risk across studies) is provided in footnotes. The **corresponding risk** (and its 95% confidence interval) is based on the assumed risk in the comparison group and the **relative effect** of the intervention (and its 95% CI).

CI: Confidence interval; RR: Risk ratio;

GRADE Working Group grades of evidence

**High quality:** Further research is very unlikely to change our confidence in the estimate of effect.

**Moderate quality:** Further research is likely to have an important impact on our confidence in the estimate of effect and may change the estimate.

**Low quality:** Further research is very likely to have an important impact on our confidence in the estimate of effect and is likely to change the estimate.

**Very low quality:** We are very uncertain about the estimate.

<sup>1</sup> Blind method not described in detail

<sup>2</sup> No detailed description of random methods or allocation of hidden methods

<sup>3</sup> Imprecision due to less research

<sup>4</sup> Per-Protocol analysis

<sup>5</sup> heterogeneity

## Supplemental Fig 11. GRADE assessment for the Global Symptom
